# Supplementary material for: Active Pharmacovigilance Study: A Follow-Up Model of Oral Anti-Cancer Drugs under Additional Monitoring
Source: MDPI journal article supplement (doi:10.3390/curroncol30040315), 2023-04-11
Supplement: s1 [file s1]

**Table S1.** Chemical structures and suspected toxicities of the studied oral antineoplastics.

| Medicines under additional monitoring | Chemical Structure <sup>1</sup>                                                     | Suspected toxicity                                                                                                                                              |
|---------------------------------------|-------------------------------------------------------------------------------------|-----------------------------------------------------------------------------------------------------------------------------------------------------------------|
| Alectinib                             | 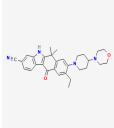   | <ul style="list-style-type: none"> <li>• Gastrointestinal disorders</li> <li>• Liver disorders</li> <li>• Lung disorders</li> <li>• Kidney disorders</li> </ul> |
| Cabozantinib                          |    | <ul style="list-style-type: none"> <li>• Mucosites</li> <li>• Hypertension</li> </ul>                                                                           |
| Entrectinib                           |    | <ul style="list-style-type: none"> <li>• Hypotension</li> <li>• Vomiting</li> </ul>                                                                             |
| Ixazomib                              |    | <ul style="list-style-type: none"> <li>• Haematological disorders</li> </ul>                                                                                    |
| Lenalidomide                          |    | <ul style="list-style-type: none"> <li>• Anorexia</li> <li>• Haematological disorders</li> <li>• Neurological disorders</li> </ul>                              |
| Lorlatinib                            |    | <ul style="list-style-type: none"> <li>• Dyslipidemia</li> </ul>                                                                                                |
| Niraparib                             |   | -                                                                                                                                                               |
| Osimertinib                           |  | <ul style="list-style-type: none"> <li>• Paronychia</li> </ul>                                                                                                  |
| Palbociclib                           |  | <ul style="list-style-type: none"> <li>• Haematological disorders</li> </ul>                                                                                    |
| Ribociclib                            |  | <ul style="list-style-type: none"> <li>• Haematological disorders</li> </ul>                                                                                    |
| Trametinib + Dabrafenib               |  | <ul style="list-style-type: none"> <li>• Fever</li> </ul>                                                                                                       |
| Vandetanib                            |  | <ul style="list-style-type: none"> <li>• QT prolongation</li> <li>• Skin disorders</li> </ul>                                                                   |
| Venetoclax                            |  | <ul style="list-style-type: none"> <li>• Haematological disorders</li> </ul>                                                                                    |
| Trifluridine + tipiracil              |  | <ul style="list-style-type: none"> <li>• Gastrointestinal disorders</li> <li>• Haematological disorders</li> <li>• Proteinuria</li> </ul>                       |

<sup>1</sup>All the chemical structures images were retrieved from the website <https://pubchem.ncbi.nlm.nih.gov/>. [Accessed 25 Mar 2023].
